# Supplementary material
Source: PubMed Central journal article supplement (PMC3040717)

## Supplementary Material and Methods

### *Construction of the BRCA1 BRCT variant set*

All the BRCA1 BRCT missense variants recorded (as of November, 2008) in the Breast Cancer Information Core (BIC) Database (<http://research.nhgri.nih.gov/bic/>) and eleven additional patient-derived variants were generated. The eleven additional variants are: T1700A (1), A1708V (2), D1739V, R1753T (3), M1775K (4), D1778Y, M1783I, Q1785H (3), E1794D (3), H1805P and R1835P.

Coding sequences for the tandem BRCT repeats of BRCA1 were generated with PCR primers FT7 (5'-gga cga gaa ttc tta acc agg gag ctg att atg gtg aac aaa aga atg tcc atg-3') and CD6 (5'-gat ctg gga tcc tca ggg gat ctg ggg tat cag-3'). The 5' primer FT7 includes a ribosome binding site and an *EcoRI* restriction site for cloning. The 3' primer CD6 includes stop codons and a *BamHI* restriction site for cloning. The mutant PCR products were then cloned into the T7 promoter based expression vector, pLM1-BRCA1-BRCT (1646-1858), as previously reported (5). For P1859R, P1856S, L1854P, Y1853C, D1851E, L1844R, A1843P, S1841R, S1841N, V1838E, W1837C, W1837G, W1837R, E1836K, R1835P and V1833M, coding sequences were amplified using FT7 and modified CD6 primers that incorporated relevant mutations. For N1647K, S1651F, M1652T, M1652I, V1653M, S1655F, G1656D, F1662S, M1663L, M1663K, L1664P, V1665M and A1669S, coding sequences were amplified using CD6 and modified FT7 that included relevant mutations. All other missense substitutions were engineered using PCR splicing methods (6). All the vectors were sequenced to confirm presence of mutagenesis.

To generate plasmid constructs for use in transcriptional assays, pLM1 vectors containing the BRCA1 variants were digested with *EcoRI* and *XbaI* and the

0.7 Kb fragment containing the variants in the context of BRCA1 aa 1646-1859 was isolated. The fragments containing the variants were ligated to a pCDNA3 vector containing a GAL4 DNA Binding Domain digested with the same enzymes (7-9).

1. Abkevich V, Zharkikh A, Deffenbaugh AM, Frank D, Chen Y, Shattuck D, et al. Analysis of missense variation in human BRCA1 in the context of interspecific sequence variation. *J Med Genet.* 2004;41:492-507.
2. Lovelock PK, Spurdle AB, Mok MT, Farrugia DJ, Lakhani SR, Healey S, et al. Identification of BRCA1 missense substitutions that confer partial functional activity: potential moderate risk variants? *Breast Cancer Res.* 2007;9:R82.
3. Carvalho MA, Marsillac SM, Karchin R, Manoukian S, Grist S, Swaby RF, et al. Determination of cancer risk associated with germ line BRCA1 missense variants by functional analysis. *Cancer Res.* 2007;67:1494-501.
4. Tischkowitz M, Hamel N, Carvalho MA, Birrane G, Soni A, van Beers EH, et al. Pathogenicity of the BRCA1 missense variant M1775K is determined by the disruption of the BRCT phosphopeptide-binding pocket: a multi-modal approach. *Eur J Hum Genet.* 2008;16:820-32.
5. Williams RS, Chasman DI, Hau DD, Hui B, Lau AY, Glover JN. Detection of protein folding defects caused by BRCA1-BRCT truncation and missense mutations. *J Biol Chem.* 2003;278:53007-16.
6. Horton RM, Ho SN, Pullen JK, Hunt HD, Cai Z, Pease LR. Gene splicing by overlap extension. *Methods Enzymol.* 1993;217:270-9.
7. Carvalho MA, Couch FJ, Monteiro AN. Functional assays for BRCA1 and BRCA2. *Int J Biochem Cell Biol.* 2007;39:298-310.
8. Vallon-Christersson J, Cayan C, Haraldsson K, Loman N, Bergthorsson JT, Brondum-Nielsen K, et al. Functional analysis of BRCA1 C-terminal missense mutations identified in breast and ovarian cancer families. *Hum Mol Genet.* 2001;10:353-60.
9. Phelan CM, Dapic V, Tice B, Favis R, Kwan E, Barany F, et al. Classification of BRCA1 missense variants of unknown clinical significance. *J Med Genet.* 2005;42:138-46.

## **Prediction of pre-mRNA splicing defects in BRCA1 BRCT variants**

In addition to the introduction of missense or nonsense mutations, single nucleotide polymorphisms can also affect pre-mRNA splicing. In theory, splicing can be disrupted through mutation of either the 5' donor, 3' acceptor or branch sites, or through creation of cryptic splice sites (1, 2). To probe the possibility that any of the BRCA1 BRCT missense variants could affect normal splicing patterns, we used the NNSplice 0.9 algorithm (3) to assess the effects of the BRCA1 SNPs on splice junction scores. The default threshold of 0.4 was used to find splice sites. Variant scores at least 20% lower or higher than the wild type score were marked as deleterious (4).

Fourteen of the tested mutants were predicted to potentially lead to splicing defects (Table 1). Nine variants (M1663L, M1663K, D1692H, D1692N, D1692Y, M1775R, M1775K, D1778Y and D1778N) gave significantly reduced splice junction scores, and may be associated with an increased risk of exon skipping. Five mutations (V1714G, S1715R, W1718C, A1752V and V1809F) were predicted to potentially lead to novel cryptic splice sites.

## Evaluation of BRCA1 missense variants

| Variant | Structural assay |   |   |   | Functional assay |       |      | Binding activity(%) | Binding specificity(%) |
|---------|------------------|---|---|---|------------------|-------|------|---------------------|------------------------|
|         | Trypsin          |   |   |   | Load             | pSPTF | SPTF |                     |                        |
|         | 1                | 2 | 3 | 4 |                  |       |      |                     |                        |
| WT      |                  |   |   |   |                  |       |      | 100                 | 100                    |
| N1647K  |                  |   |   |   |                  |       |      | 93±27               | 78±24                  |
| S1651F  |                  |   |   |   |                  |       |      | 118±23              | 112±28                 |
| M1652T  |                  |   |   |   |                  |       |      | 79±22               | 83±10                  |
| M1652I  |                  |   |   |   |                  |       |      | 75±24               | 100±7                  |
| V1653M  |                  |   |   |   |                  |       |      | 57±10               | 47±19                  |
| S1655F  |                  |   |   |   |                  |       |      | 9±2                 | 36±11                  |
| G1656D  |                  |   |   |   |                  |       |      | 3±1                 | 8±2                    |
| F1662S  |                  |   |   |   |                  |       |      | 67±33               | 76±18                  |
| M1663L  |                  |   |   |   |                  |       |      | 56±17               | 98±14                  |
| M1663K  |                  |   |   |   |                  |       |      | 94±25               | 102±19                 |
| L1664P  |                  |   |   |   |                  |       |      | 103±31              | 139±13                 |
| V1665M  |                  |   |   |   |                  |       |      | 77±5                | 72±3                   |
| A1669S  |                  |   |   |   |                  |       |      | 108±18              | 66±7                   |
| E1682K  |                  |   |   |   |                  |       |      | 76±11               | 87±15                  |
| E1682V  |                  |   |   |   |                  |       |      | 107±8               | 55±1                   |
| T1685I  |                  |   |   |   |                  |       |      | 32±10               | 11±6                   |
| T1685A  |                  |   |   |   |                  |       |      | 16±0                | 14±1                   |
| M1689T  |                  |   |   |   |                  |       |      | 31±17               | 22±8                   |
| M1689R  |                  |   |   |   |                  |       |      | N/A                 | N/A                    |
| T1691K  |                  |   |   |   |                  |       |      | 10±4                | 2±1                    |
| T1691I  |                  |   |   |   |                  |       |      | 68±37               | 5±2                    |
| D1692H  |                  |   |   |   |                  |       |      | 48±14               | 32±15                  |
| D1692N  |                  |   |   |   |                  |       |      | 88±27               | 130±12                 |
| D1692Y  |                  |   |   |   |                  |       |      | 83±17               | 45±8                   |
| F1695L  |                  |   |   |   |                  |       |      | 113±10              | 59±3                   |
| V1696L  |                  |   |   |   |                  |       |      | 4±2                 | 15±2                   |
| C1697R  |                  |   |   |   |                  |       |      | 37±0                | 22±11                  |
| R1699W  |                  |   |   |   |                  |       |      | 3±2                 | 8±3                    |
| R1699Q  |                  |   |   |   |                  |       |      | 9±3                 | 10±2                   |
| R1699L  |                  |   |   |   |                  |       |      | 9±4                 | 5±1                    |
| T1700A  |                  |   |   |   |                  |       |      | 3±2                 | 5±2                    |
| G1706A  |                  |   |   |   |                  |       |      | 108±21              | 108±12                 |
| G1706E  |                  |   |   |   |                  |       |      | 5±0                 | 14±2                   |
| A1708V  |                  |   |   |   |                  |       |      | 24±3                | 16±10                  |
| A1708E  |                  |   |   |   |                  |       |      | 24±5                | 9±4                    |

Structural stability for each variant was assessed by digestion of trypsin at 1 µg/ml (lane 2), 10 µg/ml (lane 3) and 100 µg/ml (lane 4). The amount of full-length variant remaining after digestion with 10 µg/ml (lane 3) was expressed as a percentage of the input protein (lane 1). Standard deviations represent results from at least 3 independent experiments.

## Evaluation of BRCA1 missense variants

| Variant | Structural assay |   |                         |      | Functional assay |      |                     |                        |        |        |
|---------|------------------|---|-------------------------|------|------------------|------|---------------------|------------------------|--------|--------|
|         | Trypsin          |   | Structural stability(%) | Load | pSPTF            | SPTF | Binding activity(%) | Binding specificity(%) |        |        |
|         | 1                | 2 |                         |      |                  |      |                     |                        | 3      | 4      |
| V1713A  |                  |   |                         |      |                  |      |                     | 61±3                   | 25±7   | 3±3    |
| V1714G  |                  |   |                         |      |                  |      |                     | 4±1                    | 13±3   | 9±1    |
| S1715R  |                  |   |                         |      |                  |      |                     | 1±0                    | 10±4   | 9±1    |
| S1715N  |                  |   |                         |      |                  |      |                     | 22±7                   | 42±25  | 7±3    |
| S1715C  |                  |   |                         |      |                  |      |                     | 59±1                   | 91±28  | 39±27  |
| W1718C  |                  |   |                         |      |                  |      |                     | 4±0                    | 97±3   | 11±1   |
| W1718S  |                  |   |                         |      |                  |      |                     | 5±1                    | 18±5   | 8±5    |
| T1720A  |                  |   |                         |      |                  |      |                     | 74±1                   | 87±4   | 56±4   |
| S1722F  |                  |   |                         |      |                  |      |                     | 3±3                    | 19±2   | 12±6   |
| R1726G  |                  |   |                         |      |                  |      |                     | 100±1                  | 84±11  | 126±27 |
| N1730S  |                  |   |                         |      |                  |      |                     | 91±5                   | 114±43 | 94±37  |
| D1733G  |                  |   |                         |      |                  |      |                     | 95±9                   | 113±15 | 99±5   |
| F1734S  |                  |   |                         |      |                  |      |                     | 20±2                   | 55±16  | 20±5   |
| V1736A  |                  |   |                         |      |                  |      |                     | 22±2                   | 72±5   | 49±3   |
| V1736G  |                  |   |                         |      |                  |      |                     | 8±1                    | 14±1   | 5±1    |
| G1738E  |                  |   |                         |      |                  |      |                     | 3±0                    | 71±3   | 3±3    |
| G1738R  |                  |   |                         |      |                  |      |                     | 2±1                    | 15±10  | 3±0    |
| D1739Y  |                  |   |                         |      |                  |      |                     | 2±1                    | 10±8   | 5±1    |
| D1739V  |                  |   |                         |      |                  |      |                     | 0±1                    | 5±4    | 11±2   |
| D1739E  |                  |   |                         |      |                  |      |                     | 11±2                   | 6±2    | 20±5   |
| D1739G  |                  |   |                         |      |                  |      |                     | N/A                    | 16±7   | 1±0    |
| V1741G  |                  |   |                         |      |                  |      |                     | 97±3                   | 5±3    | 8±9    |
| H1746N  |                  |   |                         |      |                  |      |                     | 55±4                   | 9±7    | 10±1   |
| P1749R  |                  |   |                         |      |                  |      |                     | 3±1                    | 29±18  | 18±9   |
| R1751P  |                  |   |                         |      |                  |      |                     | 0±1                    | 6±3    | 3±1    |
| R1751Q  |                  |   |                         |      |                  |      |                     | 59±4                   | 76±12  | 58±10  |
| A1752V  |                  |   |                         |      |                  |      |                     | 0±0                    | 89±7   | 31±8   |
| A1752P  |                  |   |                         |      |                  |      |                     | N/A                    | 16±12  | 5±1    |
| R1753T  |                  |   |                         |      |                  |      |                     | 0±1                    | 42±9   | 16±9   |
| F1761S  |                  |   |                         |      |                  |      |                     | 18±1                   | N/A    | N/A    |
| G1763V  |                  |   |                         |      |                  |      |                     | 41±1                   | 19±1   | 15±7   |
| L1764P  |                  |   |                         |      |                  |      |                     | 18±0                   | 23±9   | 19±6   |
| I1766S  |                  |   |                         |      |                  |      |                     | 0±1                    | 94±11  | 5±1    |
| P1771L  |                  |   |                         |      |                  |      |                     | 74±5                   | 75±15  | 87±38  |
| P1771R  |                  |   |                         |      |                  |      |                     | 75±5                   | 97±31  | 85±16  |
| T1773I  |                  |   |                         |      |                  |      |                     | 78±5                   | 63±5   | 15±7   |

## Evaluation of BRCA1 missense variants

| Variant | Structural assay                                                                             |                         | Functional assay |       |      |                     |                        |
|---------|----------------------------------------------------------------------------------------------|-------------------------|------------------|-------|------|---------------------|------------------------|
|         | Trypsin<br>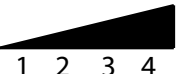 | Structural stability(%) | Load             | pSPTF | SPTF | Binding activity(%) | Binding specificity(%) |
| T1773S  |                                                                                              | 70±3                    |                  |       |      | 68±7                | 71±25                  |
| M1775R  |                                                                                              | 48±5                    |                  |       |      | 3±1                 | 21±10                  |
| M1775K  |                                                                                              | 103±7                   |                  |       |      | 19±3                | 12±0                   |
| D1778G  |                                                                                              | 103±6                   |                  |       |      | 87±21               | 88±15                  |
| D1778Y  |                                                                                              | 99±8                    |                  |       |      | 82±23               | 80±8                   |
| D1778N  |                                                                                              | 90±6                    |                  |       |      | 105±19              | 92±12                  |
| L1780P  |                                                                                              | 9±2                     |                  |       |      | 29±5                | 2±0                    |
| M1783I  |                                                                                              | 112±2                   |                  |       |      | 84±16               | 92±12                  |
| M1783T  |                                                                                              | 75±10                   |                  |       |      | 48±7                | 59±2                   |
| M1783L  |                                                                                              | 106±0                   |                  |       |      | 139±16              | 96±27                  |
| Q1785H  |                                                                                              | 101±7                   |                  |       |      | 98±3                | 66±22                  |
| C1787S  |                                                                                              | 108±7                   |                  |       |      | 113±2               | 72±8                   |
| G1788V  |                                                                                              | 0±0                     |                  |       |      | 107±6               | 16±3                   |
| G1788D  |                                                                                              | 100±6                   |                  |       |      | 66±2                | 32±10                  |
| A1789S  |                                                                                              | 87±4                    |                  |       |      | 56±7                | 63±13                  |
| E1794D  |                                                                                              | 93±2                    |                  |       |      | 112±26              | 109±25                 |
| G1803A  |                                                                                              | 84±5                    |                  |       |      | 92±5                | 103±10                 |
| V1804D  |                                                                                              | 89±9                    |                  |       |      | 119±10              | 53±1                   |
| H1805P  |                                                                                              | 70±2                    |                  |       |      | 102±21              | 75±16                  |
| P1806A  |                                                                                              | 74±2                    |                  |       |      | 79±15               | 106±13                 |
| V1808A  |                                                                                              | 95±5                    |                  |       |      | 68±12               | 58±10                  |
| V1809F  |                                                                                              | 12±2                    |                  |       |      | 72±22               | 39±8                   |
| V1809A  |                                                                                              | 84±4                    |                  |       |      | 66±13               | 49±8                   |
| V1810G  |                                                                                              | 83±2                    |                  |       |      | 97±9                | 69±3                   |
| Q1811R  |                                                                                              | 51±3                    |                  |       |      | 37±2                | 20±0                   |
| D1818G  |                                                                                              | 57±6                    |                  |       |      | 104±6               | 88±10                  |
| N1819S  |                                                                                              | 90±6                    |                  |       |      | 98±1                | 82±6                   |
| A1823T  |                                                                                              | 112±2                   |                  |       |      | 141±2               | 105±9                  |
| Q1826H  |                                                                                              | 88±3                    |                  |       |      | 52±6                | 59±25                  |
| A1830T  |                                                                                              | 100±1                   |                  |       |      | 85±9                | 49±2                   |
| V1833M  |                                                                                              | 55±4                    |                  |       |      | 96±22               | 80±8                   |
| R1835P  |                                                                                              | 106±14                  |                  |       |      | N/A                 | N/A                    |
| E1836K  |                                                                                              | 67±8                    |                  |       |      | 2±0                 | 2±1                    |
| W1837R  |                                                                                              | 3±0                     |                  |       |      | 18±3                | 10±4                   |
| W1837G  |                                                                                              | 2±1                     |                  |       |      | 24±9                | 39±3                   |
| W1837C  |                                                                                              | 2±2                     |                  |       |      | 7±3                 | 1±0                    |

Lee, M. *et al.* Supplementary Figure 1d  
**Evaluation of BRCA1 missense variants**

| Variant | Structural assay |   |   |   | Functional assay |       |      | Binding activity(%) | Binding specificity(%) |
|---------|------------------|---|---|---|------------------|-------|------|---------------------|------------------------|
|         | Trypsin          |   |   |   | Load             | pSPTF | SPTF |                     |                        |
|         | 1                | 2 | 3 | 4 |                  |       |      |                     |                        |
| V1838E  |                  |   |   |   |                  |       |      | 22±10               | 11±4                   |
| S1841N  |                  |   |   |   |                  |       |      | 26±1                | 5±1                    |
| S1841R  |                  |   |   |   |                  |       |      | 17±3                | 7±1                    |
| A1843P  |                  |   |   |   |                  |       |      | 27±10               | 16±2                   |
| L1844R  |                  |   |   |   |                  |       |      | 42±11               | 67±2                   |
| D1851E  |                  |   |   |   |                  |       |      | 71±8                | 89±6                   |
| Y1853C  |                  |   |   |   |                  |       |      | 14±3                | 4±3                    |
| L1854P  |                  |   |   |   |                  |       |      | 78±31               | 100±20                 |
| P1856S  |                  |   |   |   |                  |       |      | 82±12               | 84±25                  |
| P1859R  |                  |   |   |   |                  |       |      | 67±12               | 127±10                 |

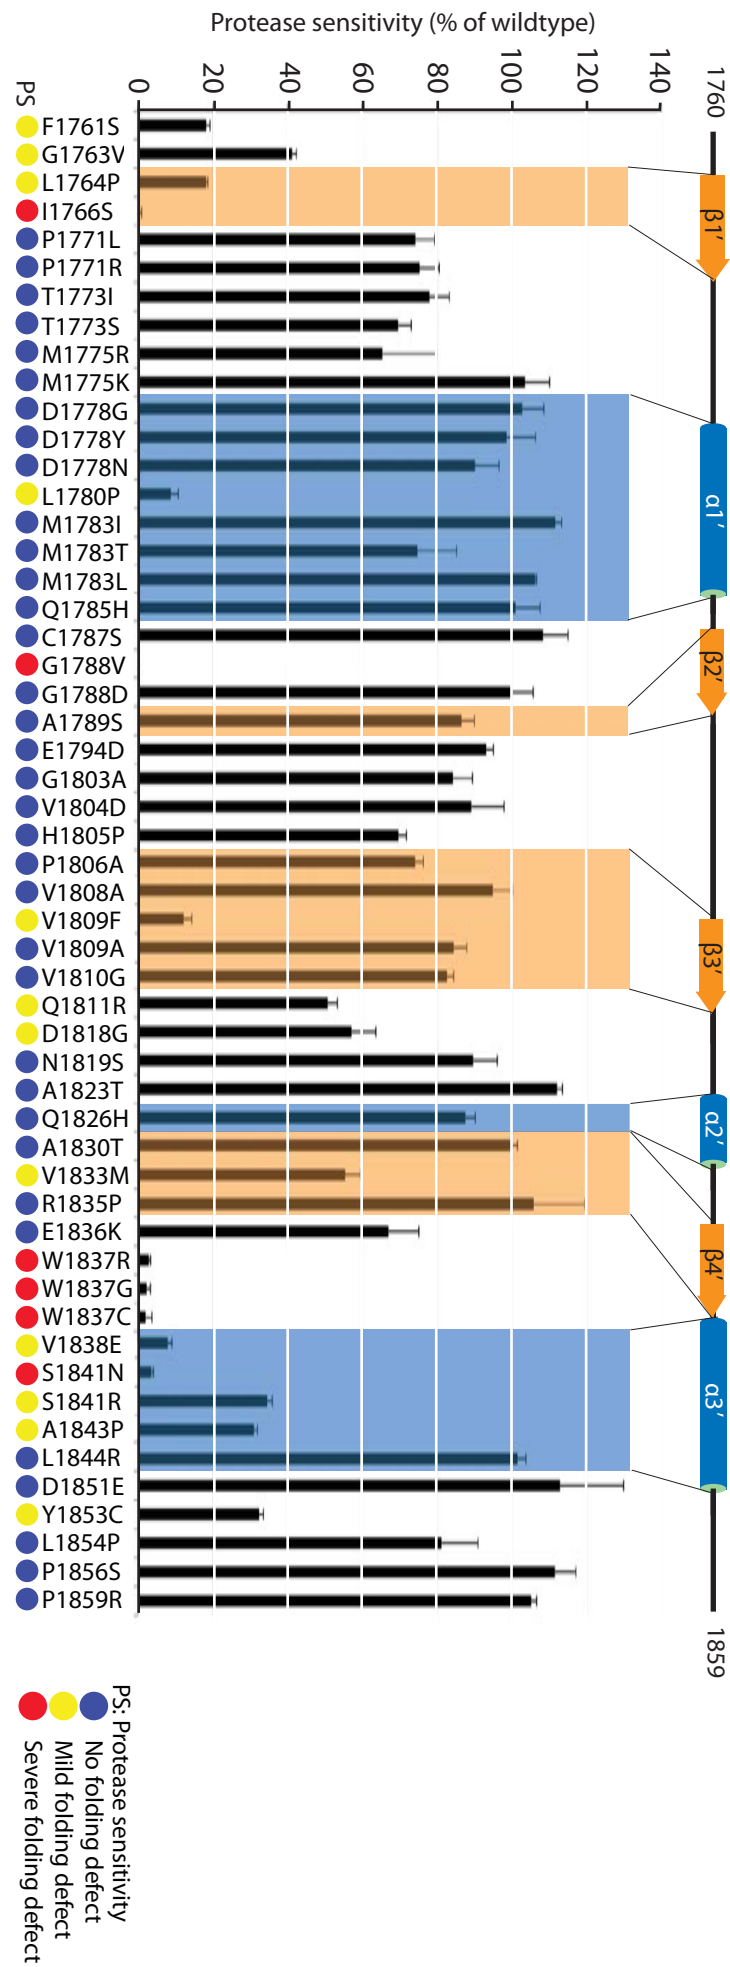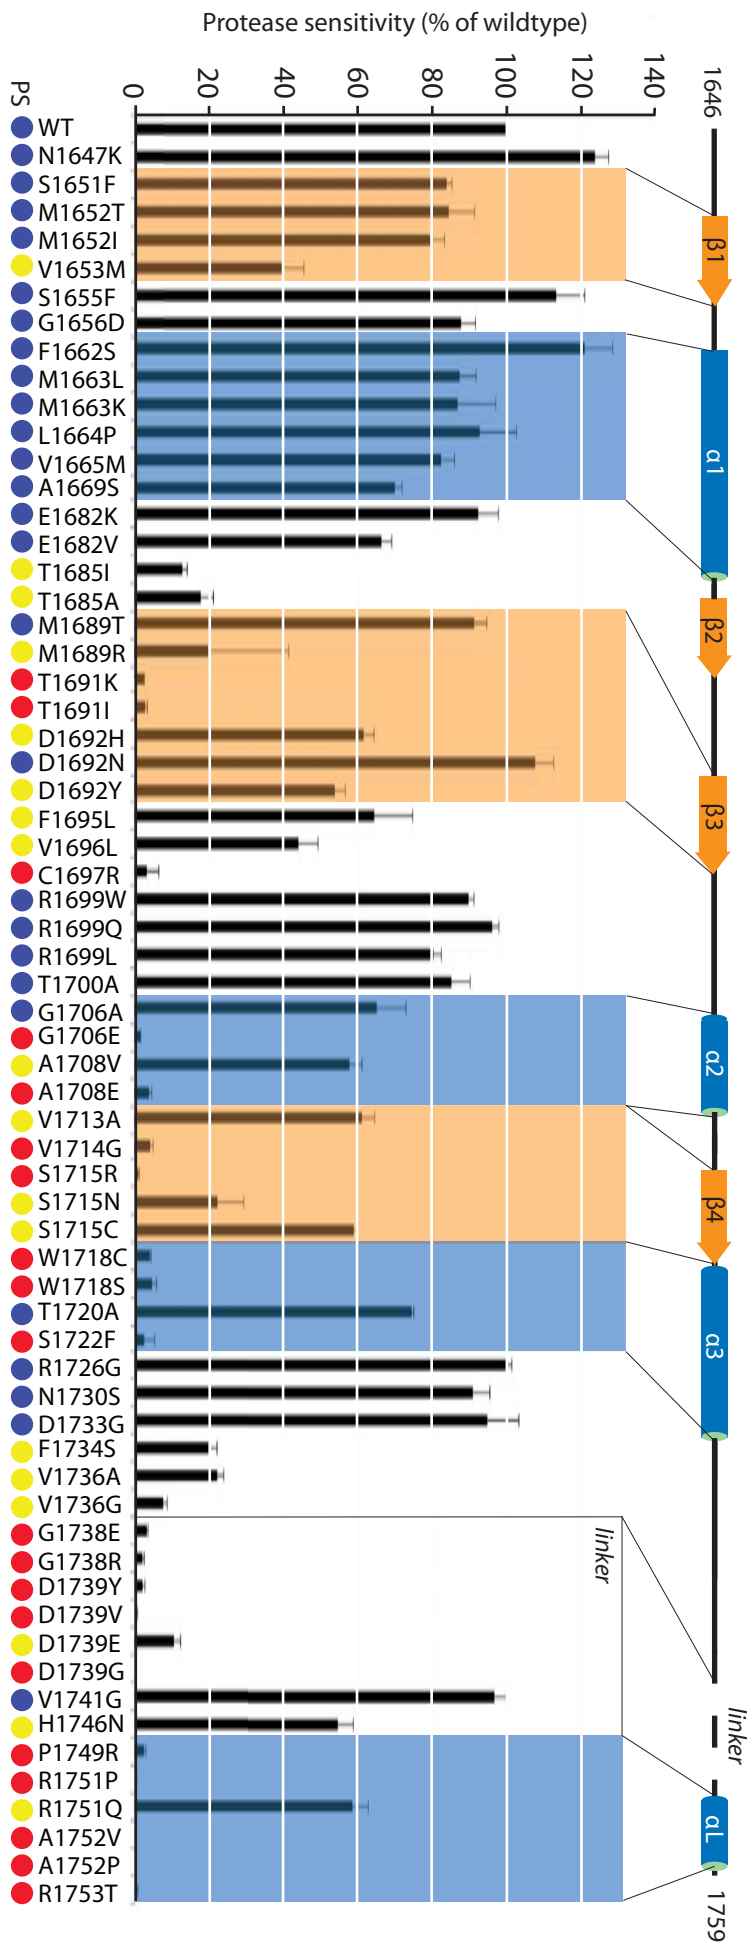



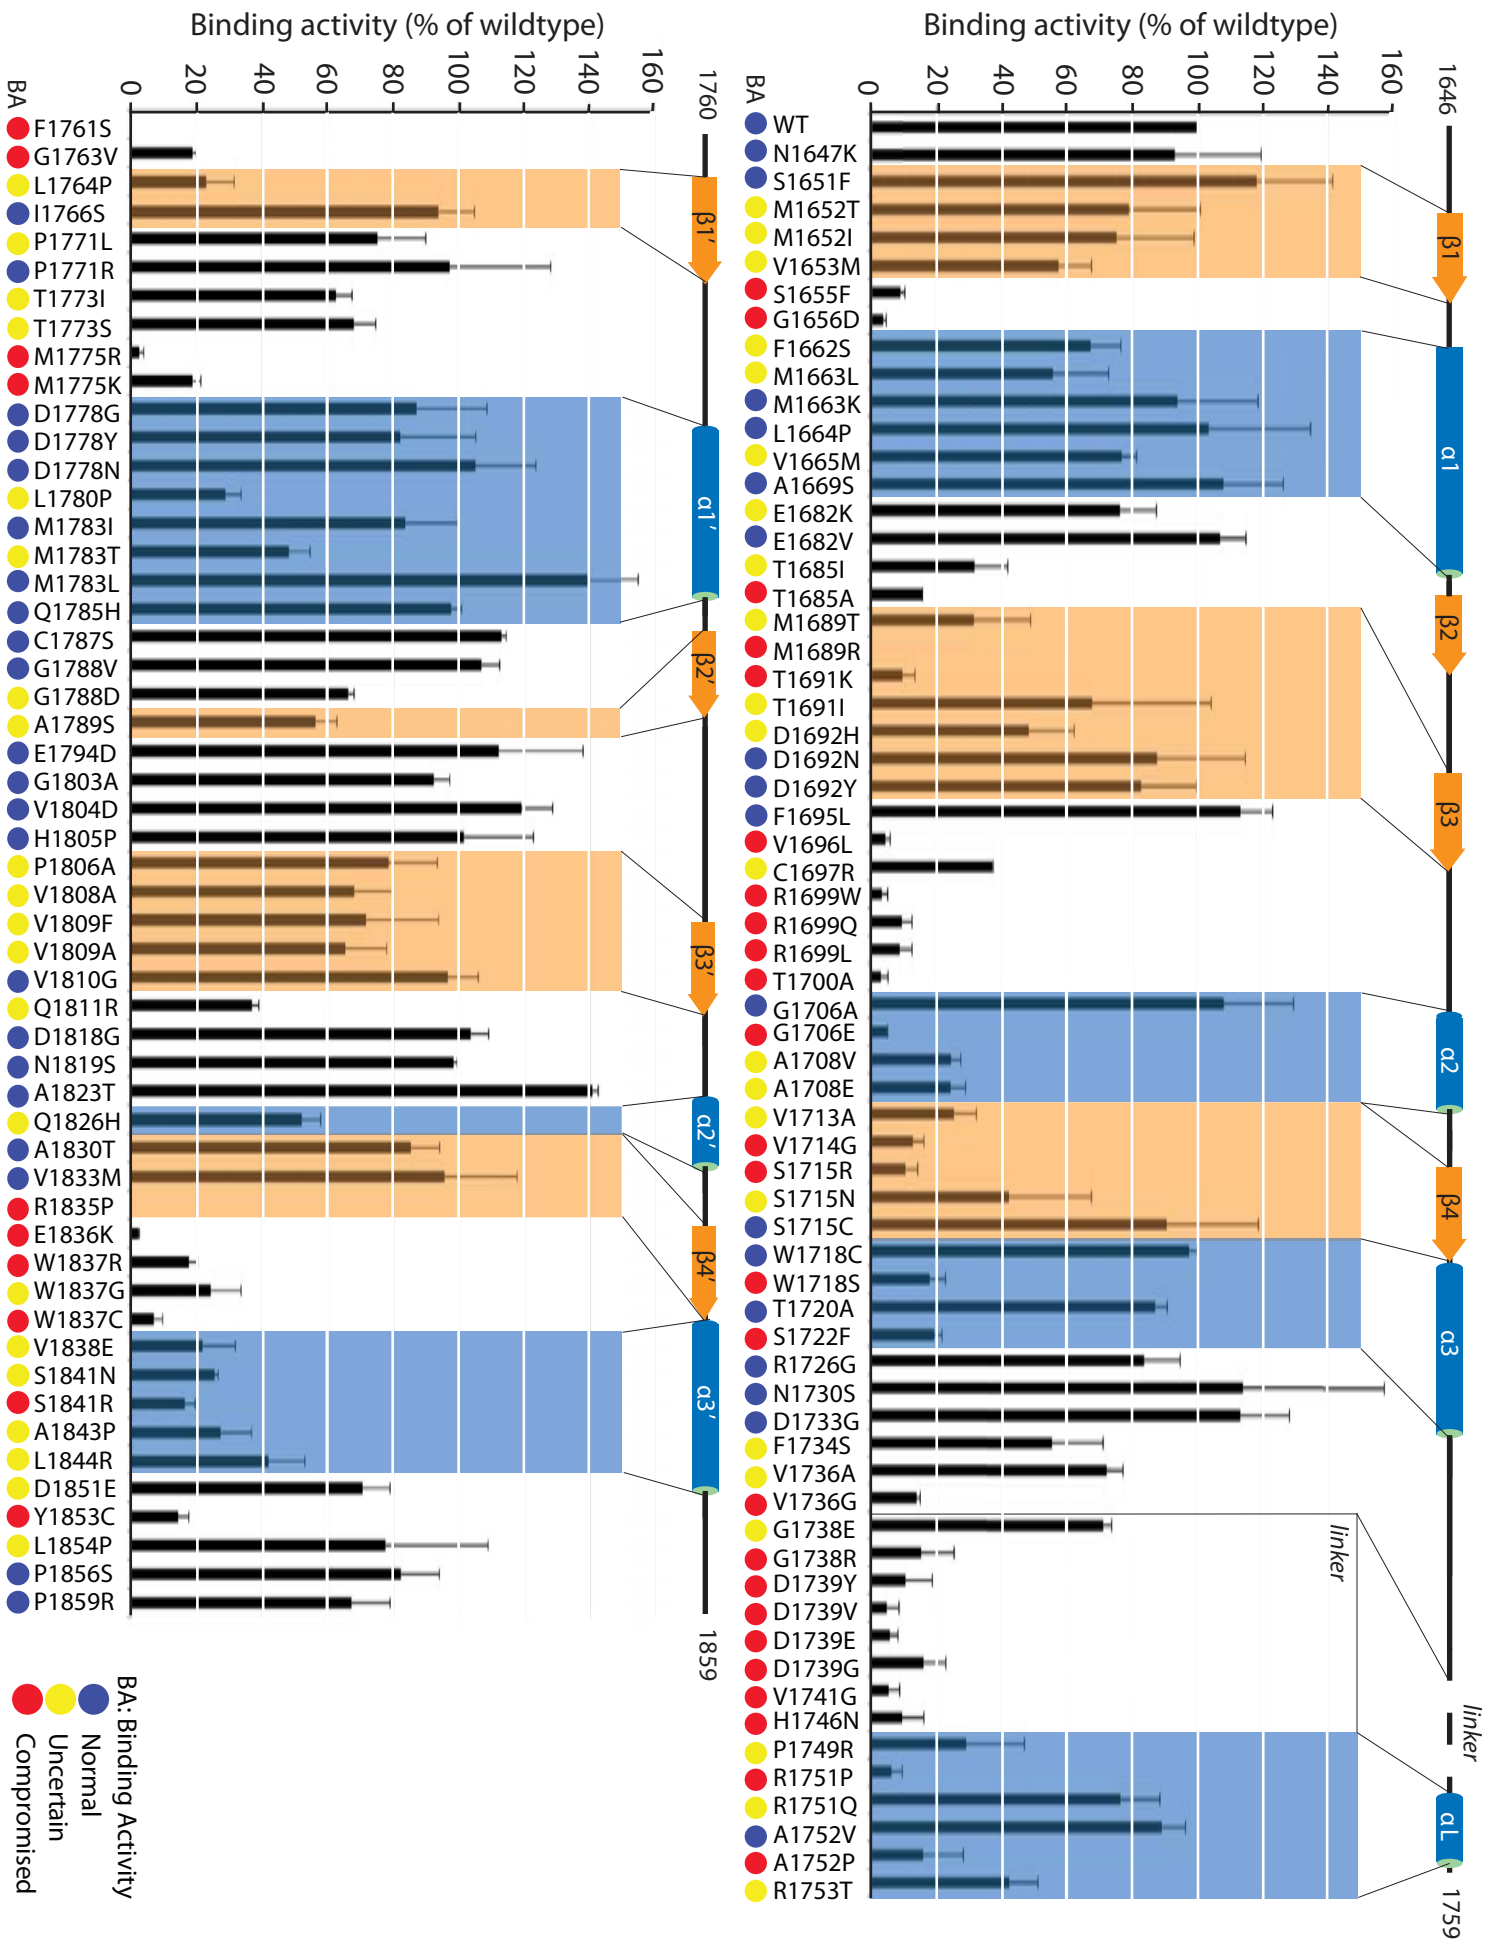

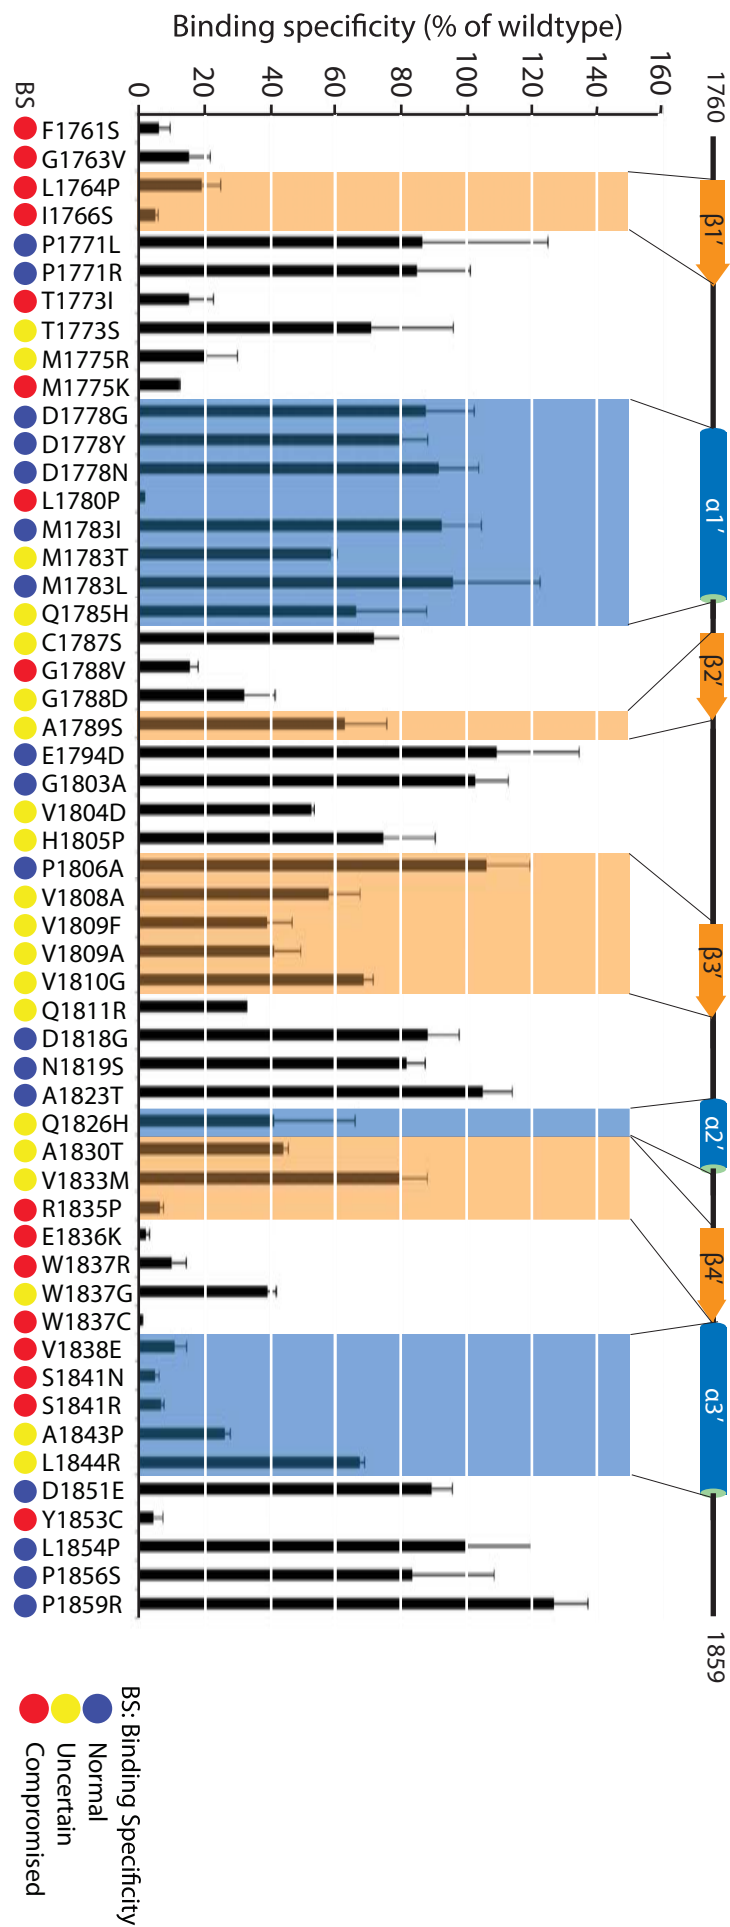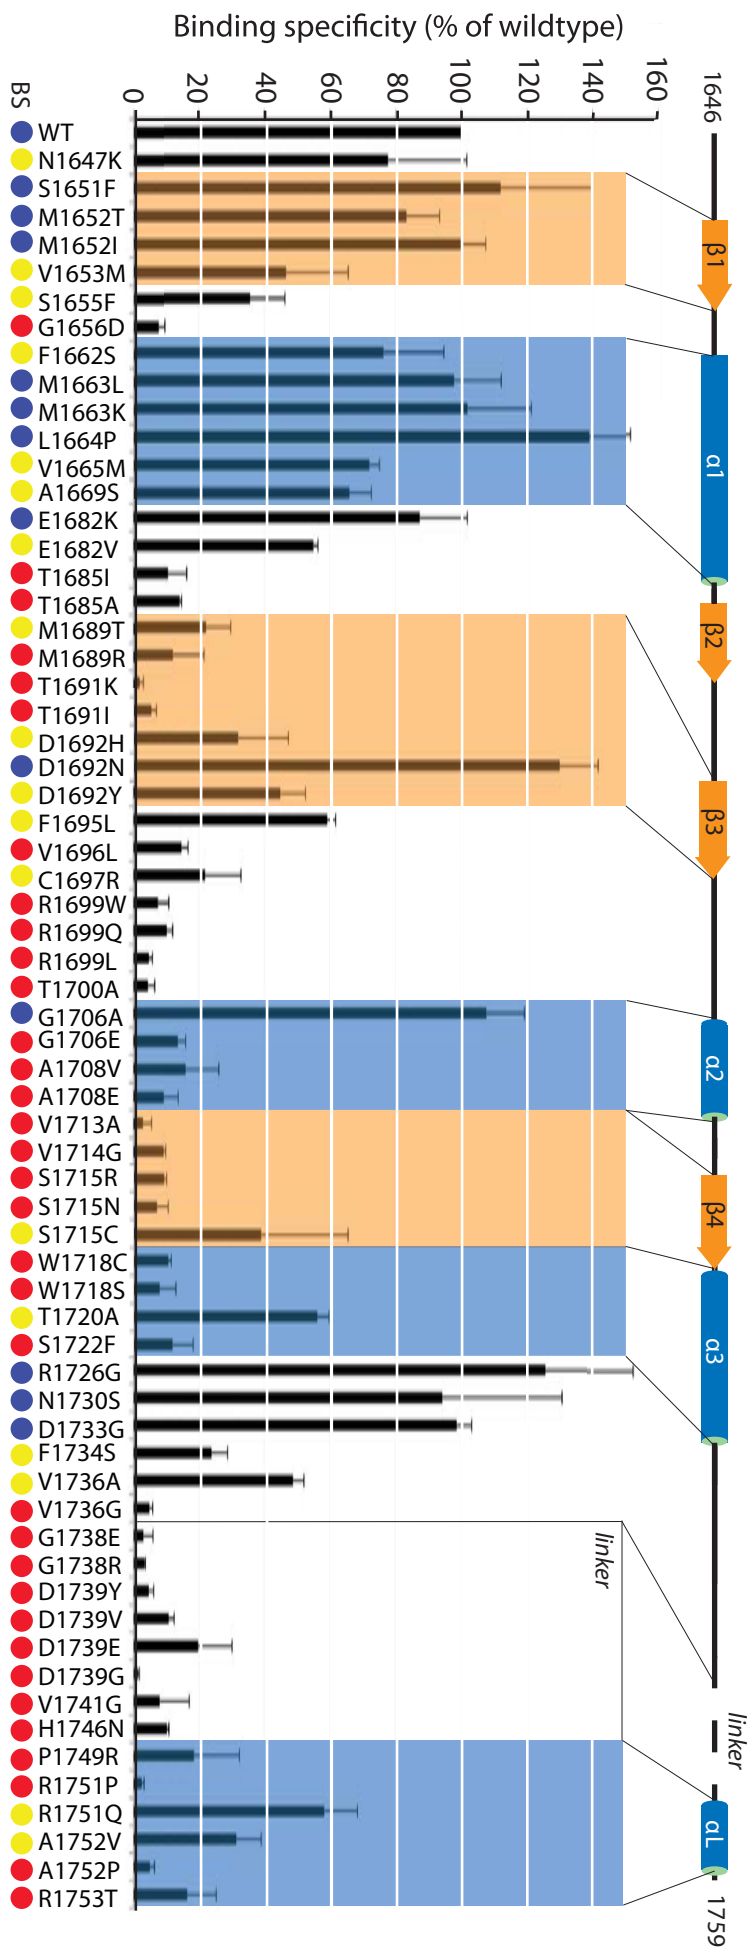

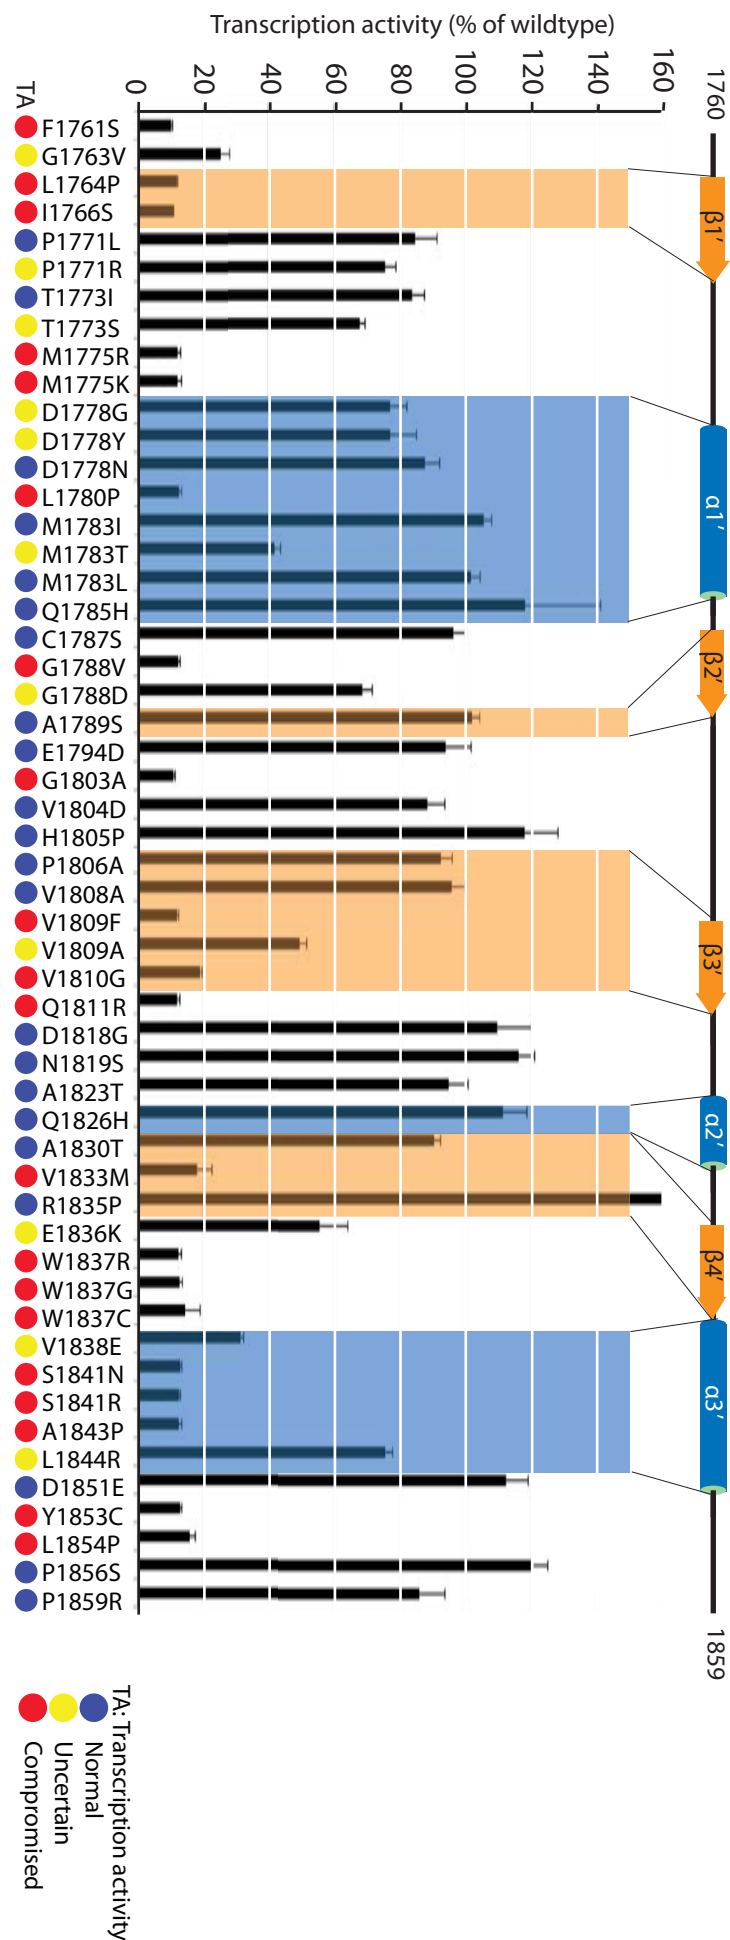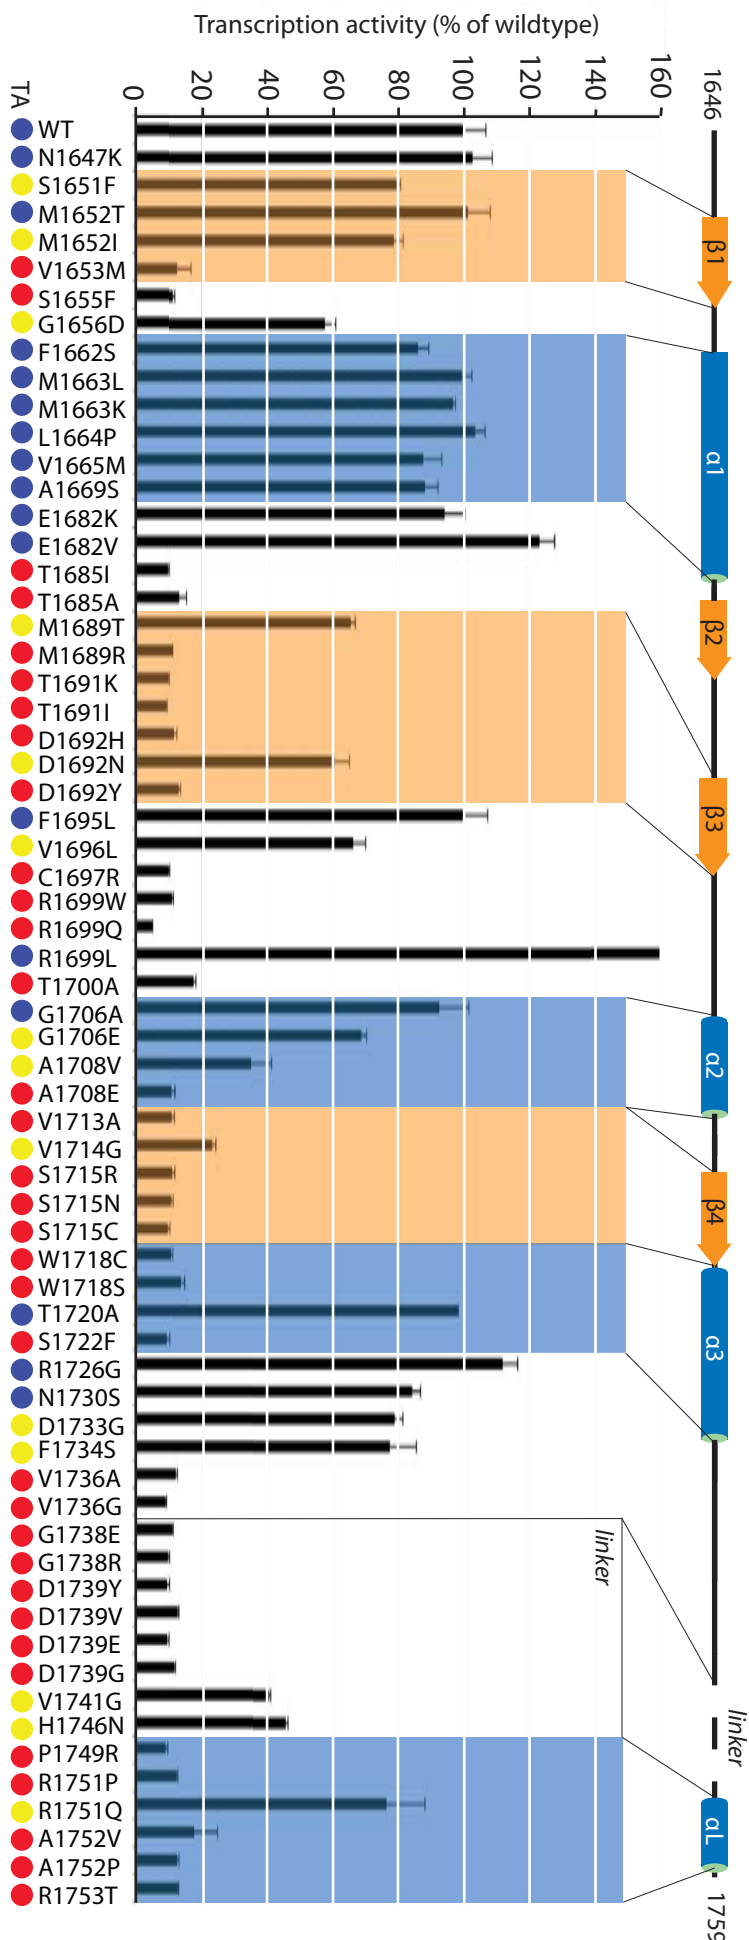

Lee, M. *et al.* Supplementary Figure 3

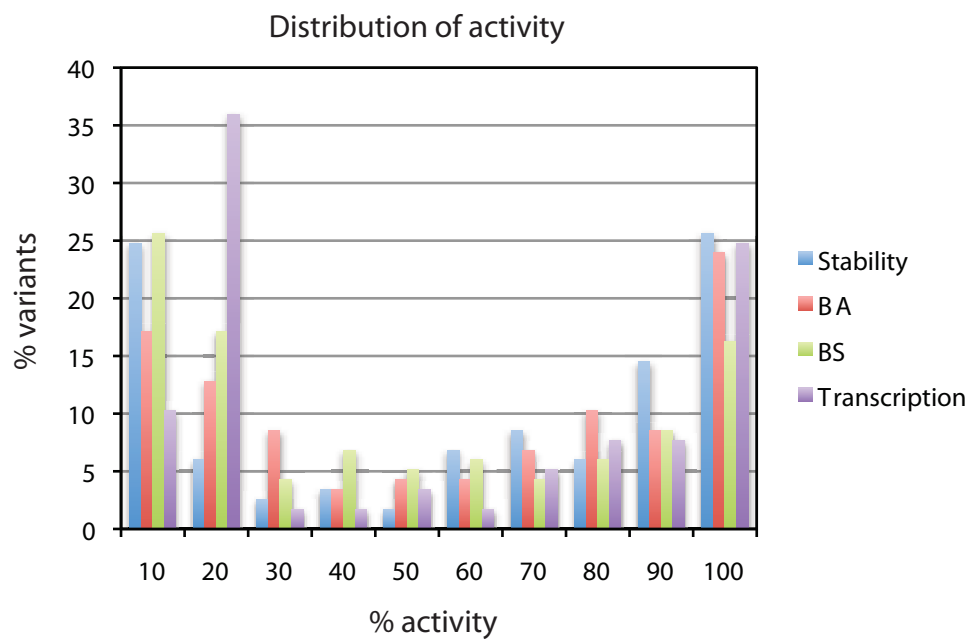

Supplement: NIHMS265402-supplement-Supplementary_Methods__Figures__Tables.pdf [file NIHMS265402-supplement-Supplementary_Methods__Figures__Tables.pdf]
